# Supplementary material for: Advancing surgical instrument safety: A screen of oxidative and alkaline prion decontaminants using real-time quaking-induced conversion with prion-coated steel beads as surgical instrument mimetic
Source: PubMed Central journal article supplement (PMC11175539; doi:10.1371/journal.pone.0304603), 2024-06-13
Supplement: pone.0304603.s005.pdf [file pone.0304603.s005.pdf]

## Western Blot to Figure 1A

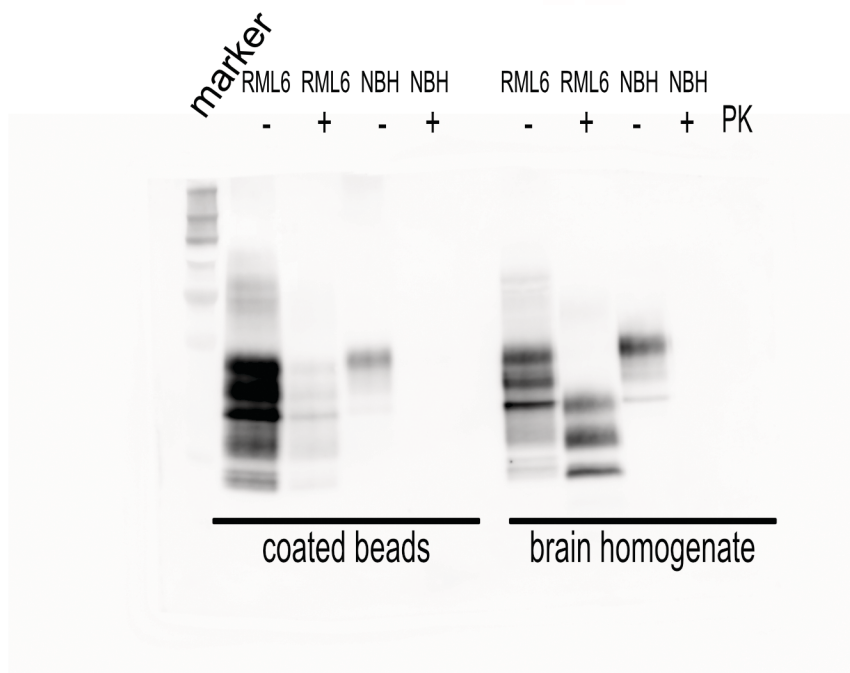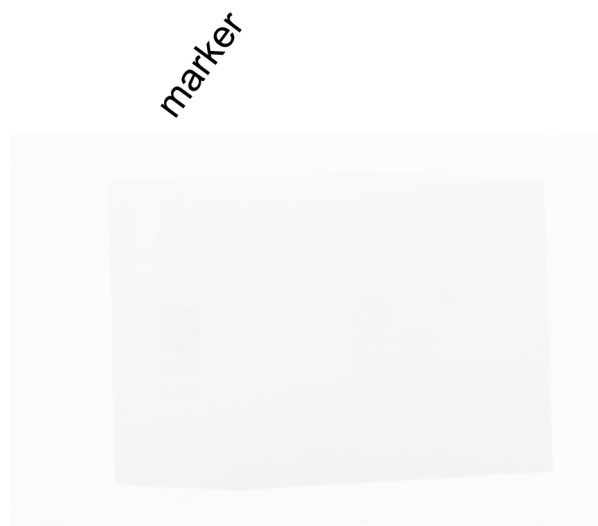

## Western Blot to Figure 2C

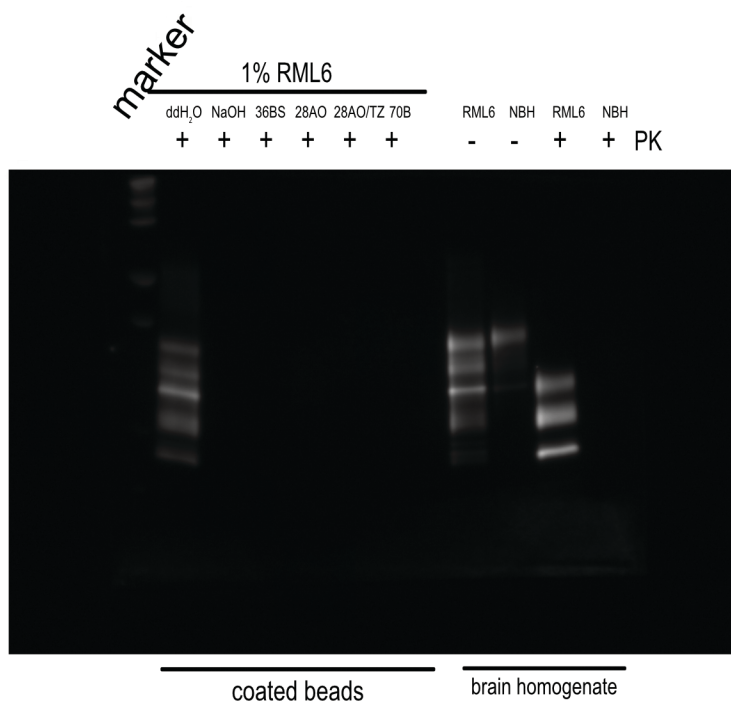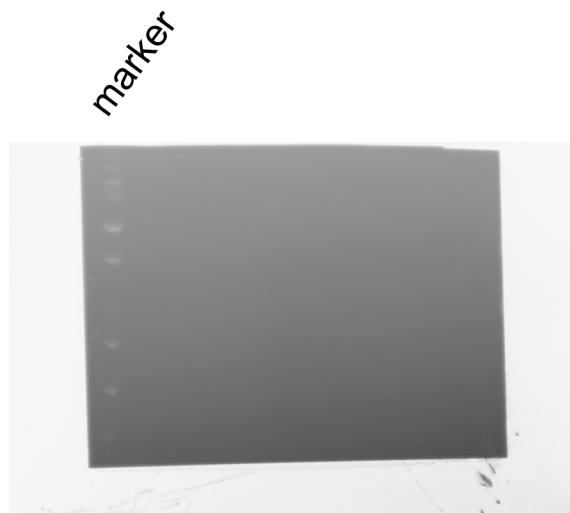

Membranes were developed with Crescendo HRP substrate (Millipore) and imaging was done using the LAC3000 system (Fuji).
